# Supplementary material
Source: PubMed Central journal article supplement (PMC4079078)

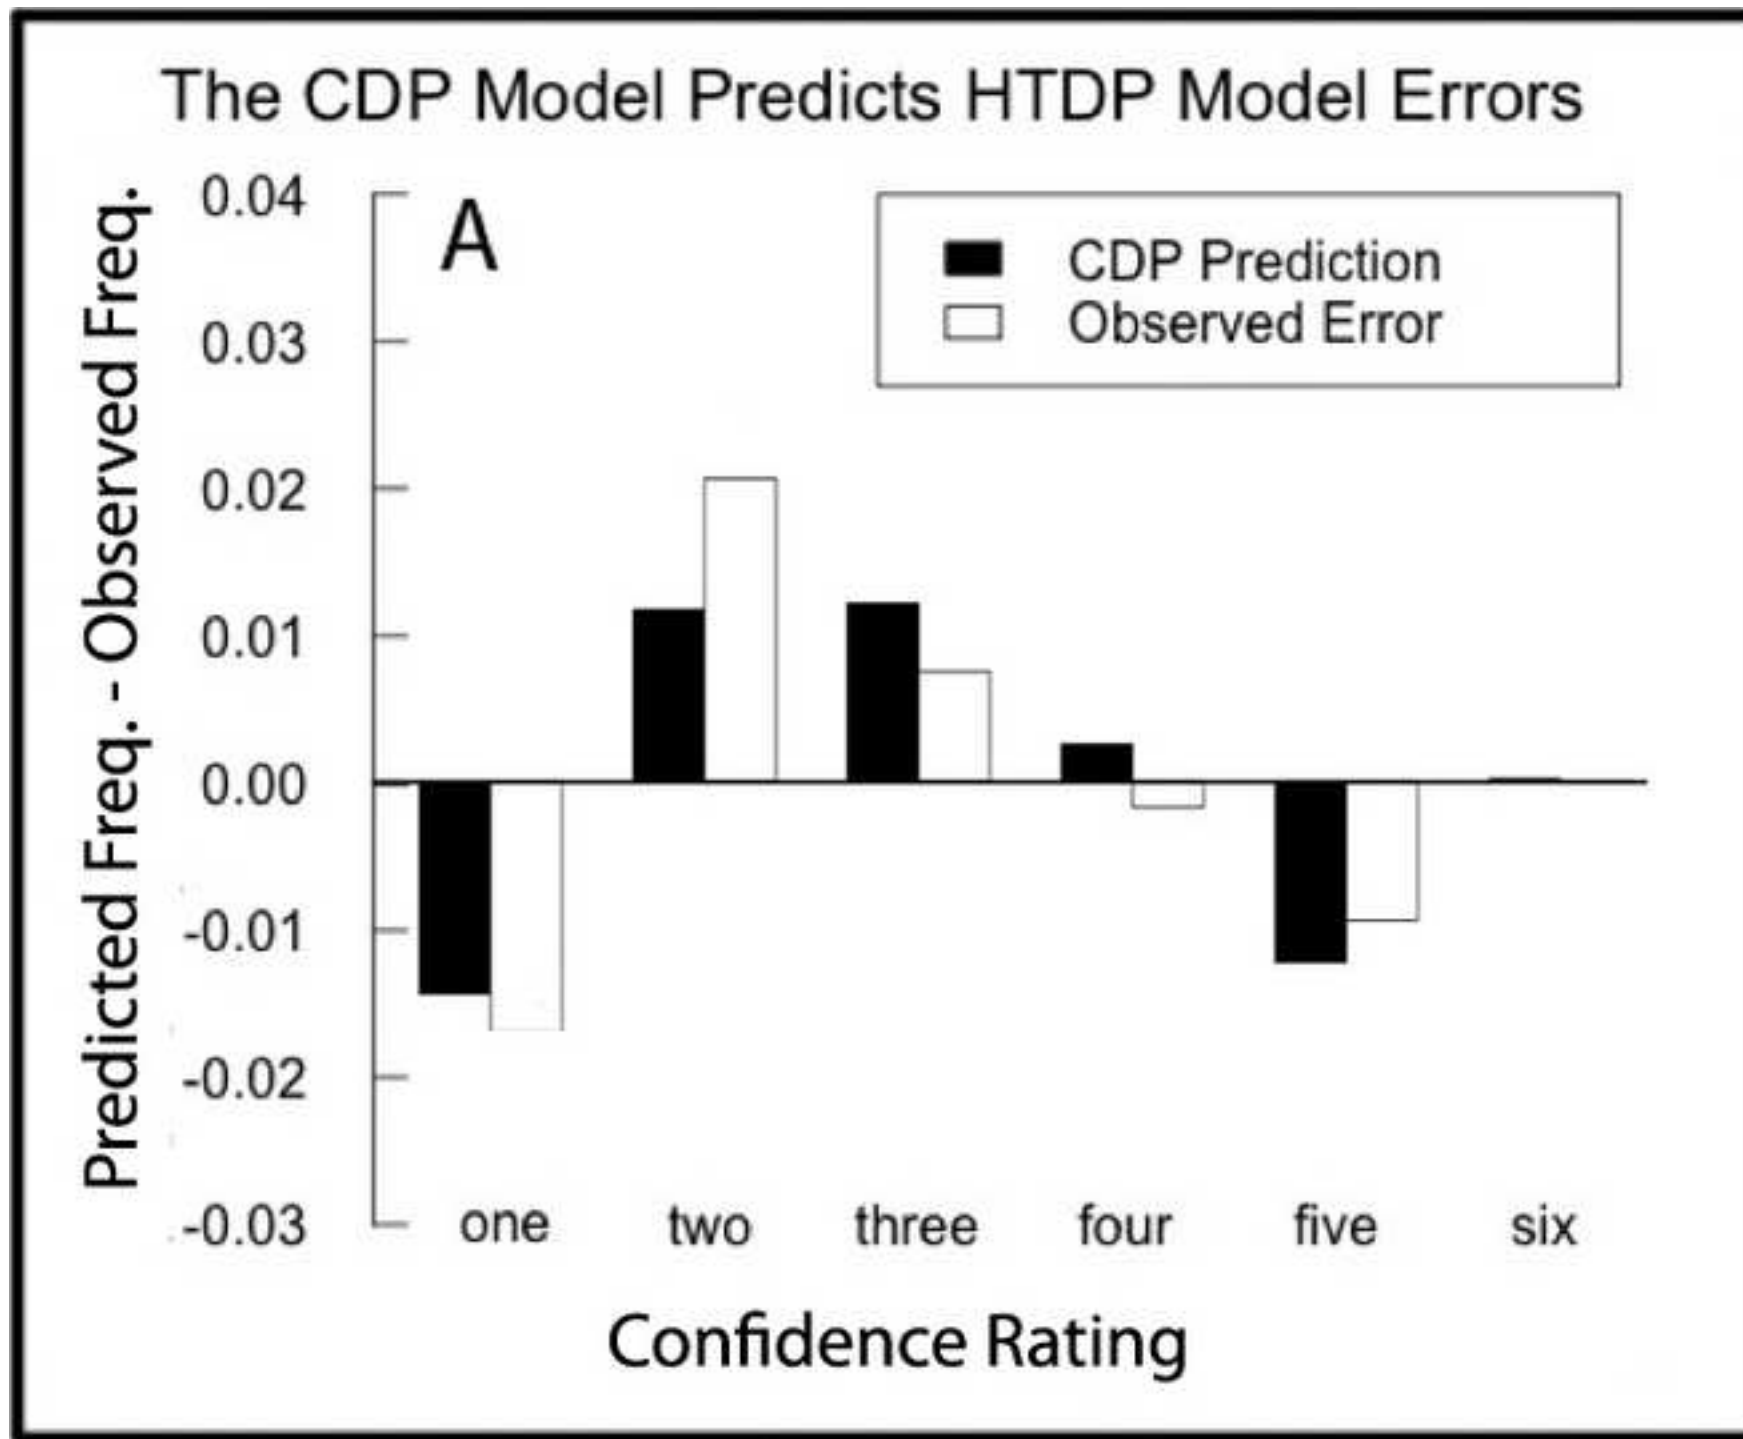

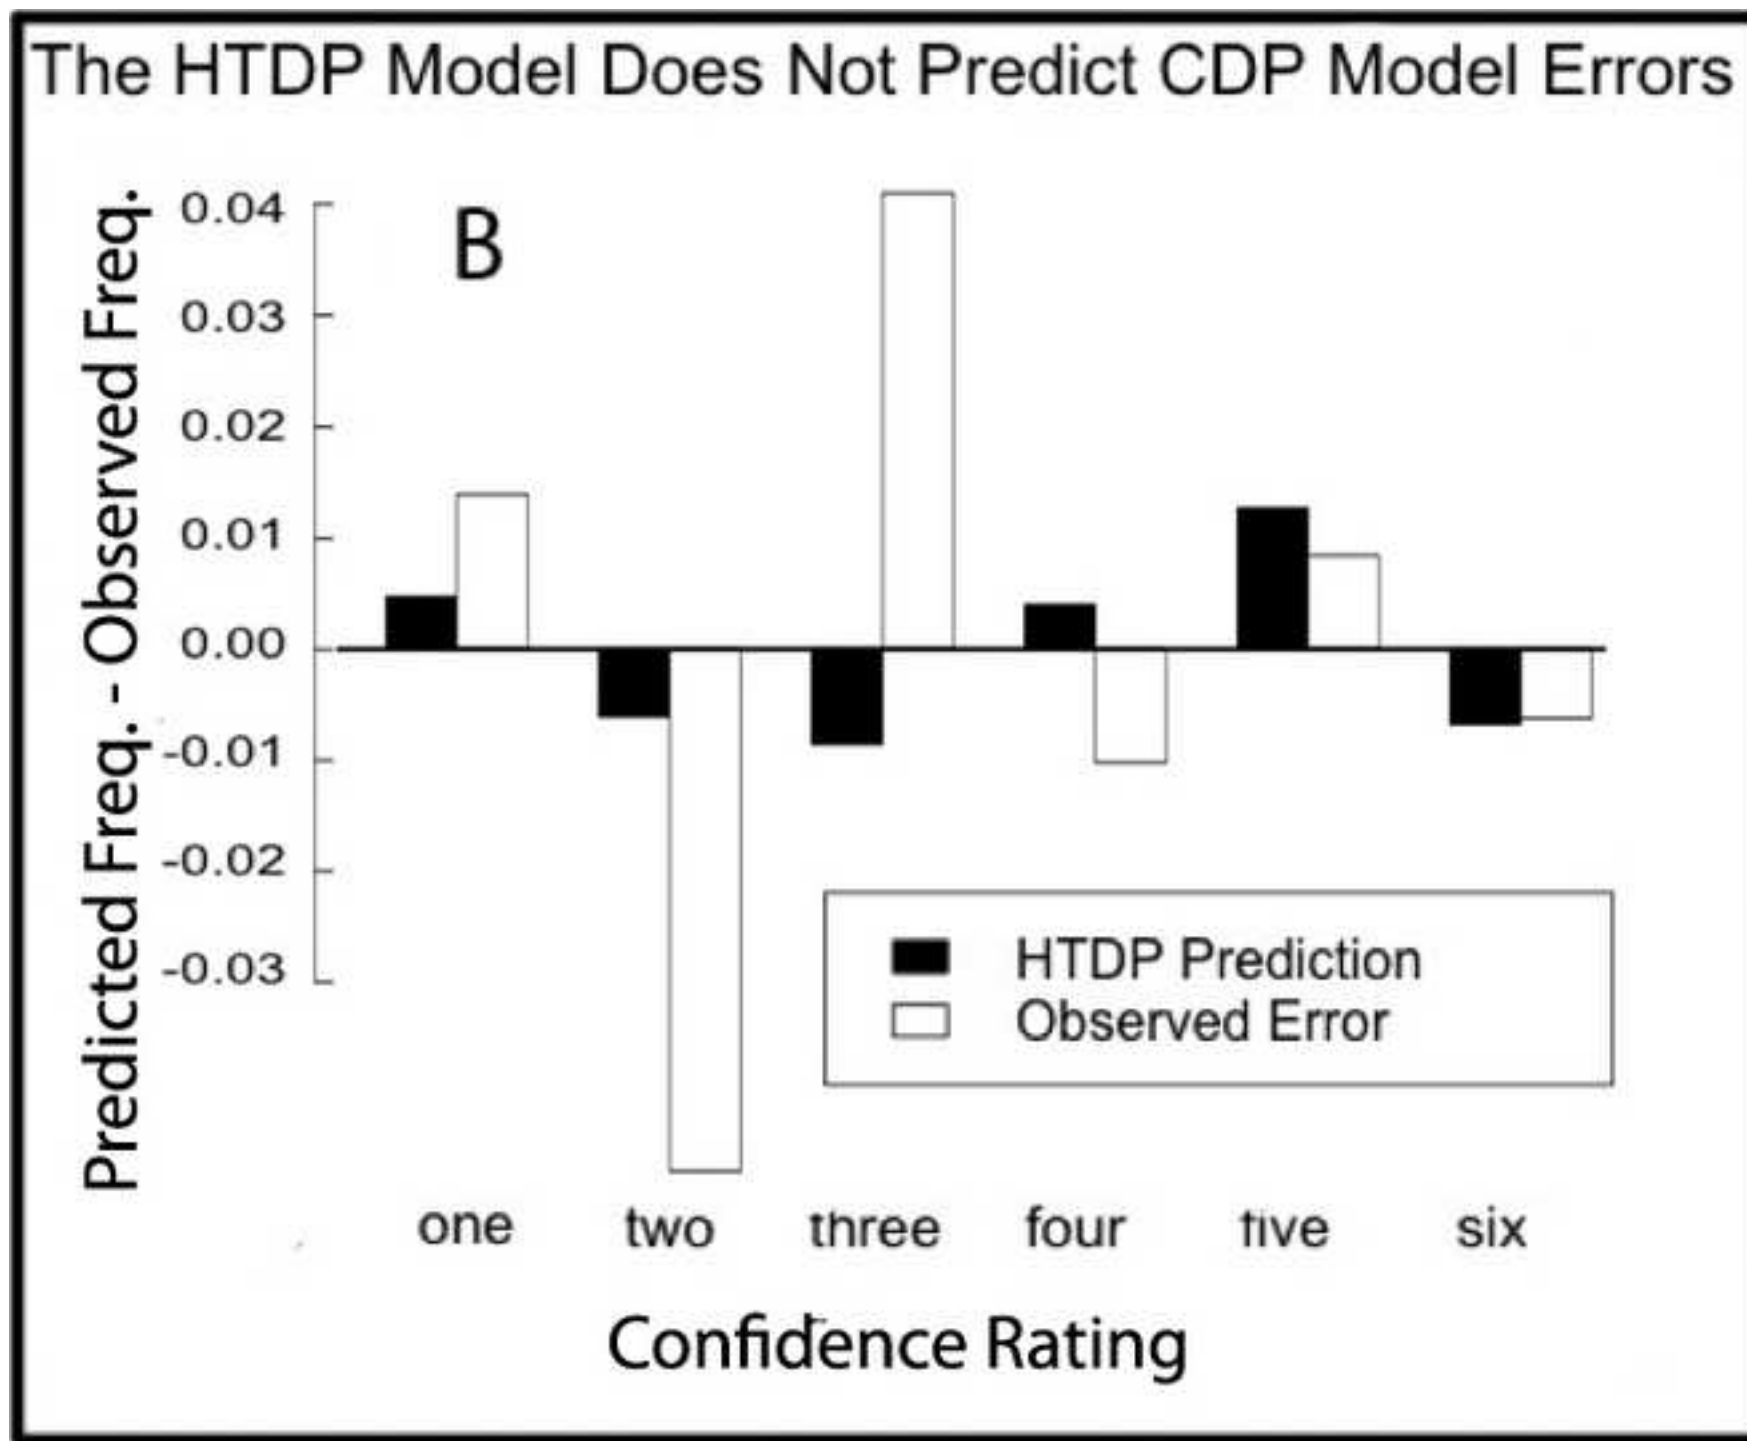

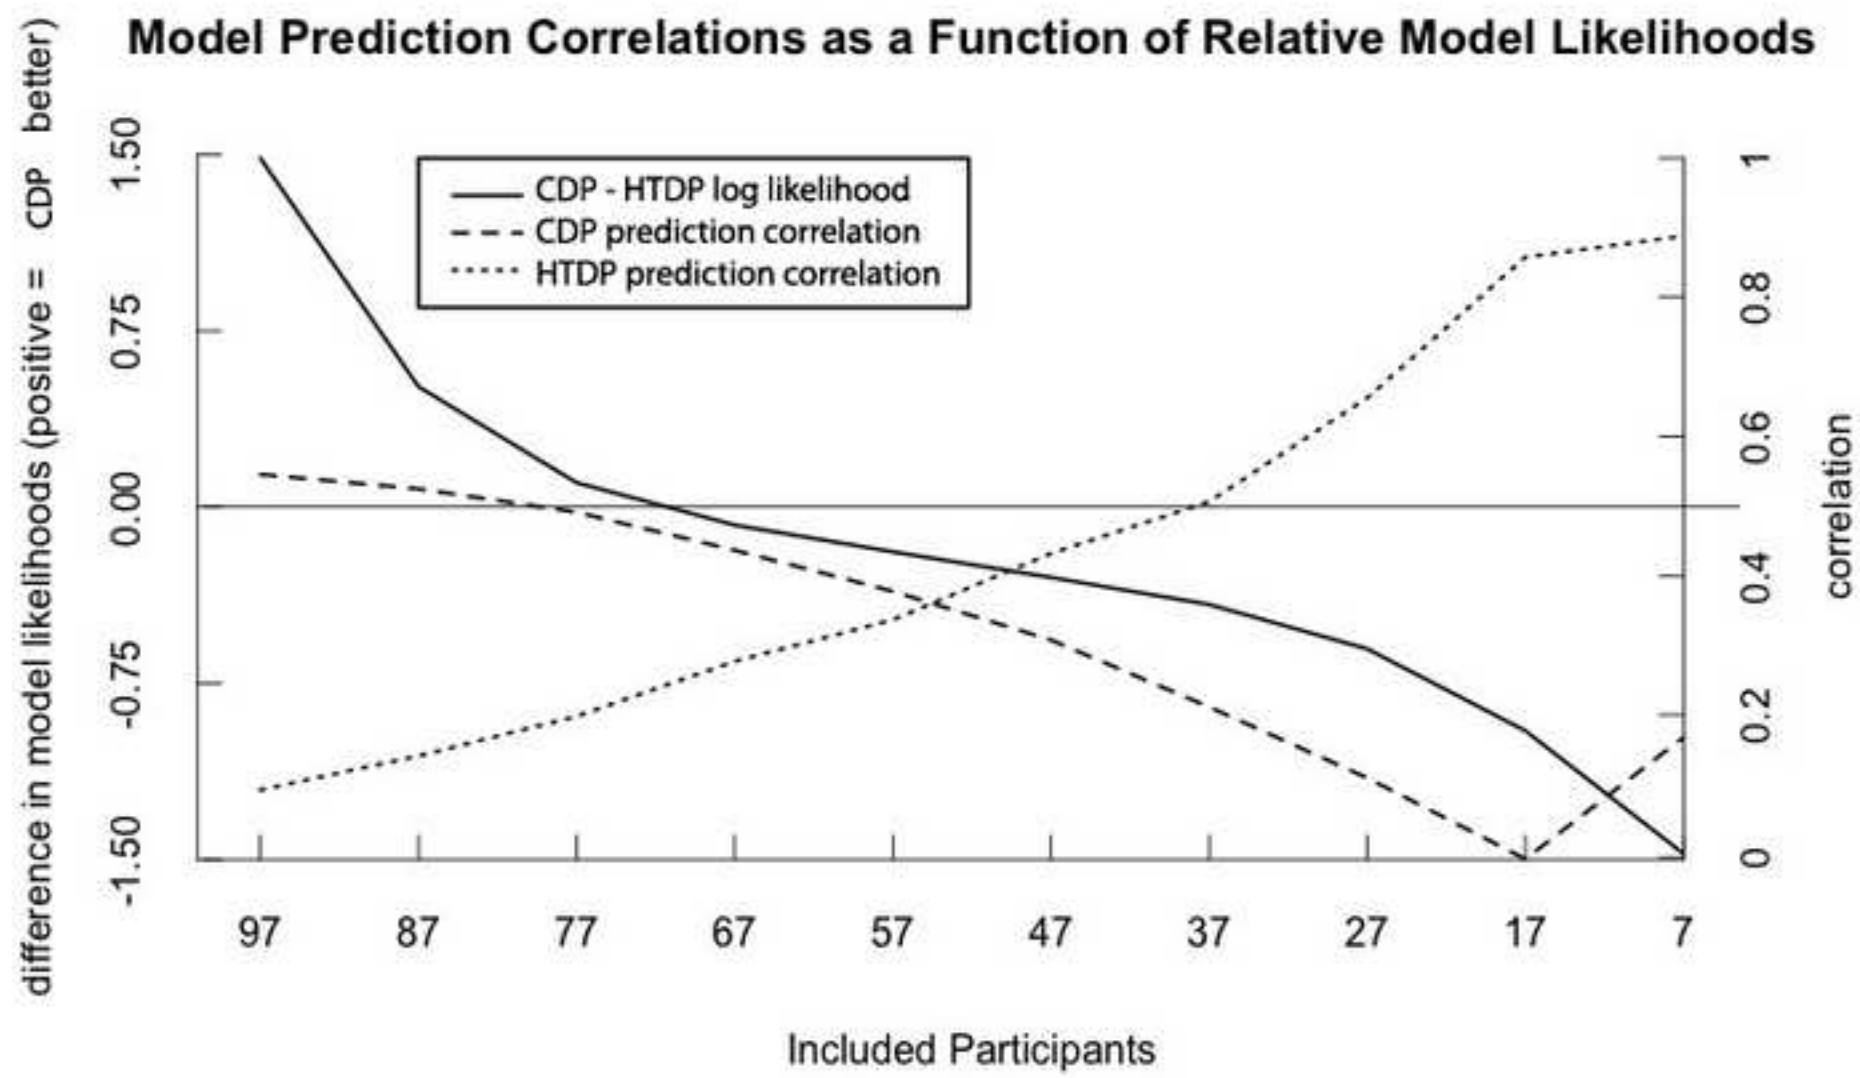

Supplement: NIHMS537442-supplement-01.pdf [file NIHMS537442-supplement-01.pdf]
